# Supplementary material
Source: publisher figshare collection journal article supplement (https://sage.figshare.com/ndownloader/files/21943857)
Supplement: Supplementary file 1 [file 21943857]

**Supplementary Table 1** Current laboratory monitoring recommendations according to the Canada's product monograph for each oral disease-modifying therapy for the treatment of multiple sclerosis.

| Oral disease-modifying therapy       | Current recommended monitoring (extracted from Canada's product monograph)                                                                                                                                                                                                                                                          |                                                                                                                                                                                                                                                                                                                                       |                                                                                                                                                                                                                                                        |
|--------------------------------------|-------------------------------------------------------------------------------------------------------------------------------------------------------------------------------------------------------------------------------------------------------------------------------------------------------------------------------------|---------------------------------------------------------------------------------------------------------------------------------------------------------------------------------------------------------------------------------------------------------------------------------------------------------------------------------------|--------------------------------------------------------------------------------------------------------------------------------------------------------------------------------------------------------------------------------------------------------|
|                                      | Biochemical liver test                                                                                                                                                                                                                                                                                                              | Lymphocyte count                                                                                                                                                                                                                                                                                                                      | Urinalysis                                                                                                                                                                                                                                             |
| <b>Dimethyl fumarate<sup>I</sup></b> | <p>Prior to initiating treatment with dimethyl fumarate, serum aminotransferase, alkaline phosphatase and total bilirubin levels should be obtained (within 6 months).</p> <p>During treatment, evaluation of transaminases is recommended after 6 months of treatment, then every 6 to 12 months, and as clinically indicated.</p> | <p>Prior to initiating treatment with dimethyl fumarate, obtain a complete blood count, including lymphocytes, if no recent (within 6 months) result is available.</p> <p>A complete blood count, including lymphocytes, is also recommended after 6 months of treatment, then every 6 to 12 months, and as clinically indicated.</p> | <p>Prior to initiating treatment with dimethyl fumarate, urinalysis should be available (within 6 months).</p> <p>During treatment, urinalysis is recommended after 6 months of treatment, then every 6 to 12 months, and as clinically indicated.</p> |
| <b>Fingolimod<sup>II</sup></b>       | Obtain transaminase and bilirubin levels prior to initiating treatment if no                                                                                                                                                                                                                                                        | Obtain a complete blood count before initiating treatment if no recent (i.e. within                                                                                                                                                                                                                                                   | Not applicable                                                                                                                                                                                                                                         |

|                                    |                                                                                                                                                                                                                             |                                                                                                                                                                                             |                |
|------------------------------------|-----------------------------------------------------------------------------------------------------------------------------------------------------------------------------------------------------------------------------|---------------------------------------------------------------------------------------------------------------------------------------------------------------------------------------------|----------------|
|                                    | recent (i.e. within the last 6 months) result is available, every 3 months during the first year of treatment and periodically thereafter in the absence of symptoms or when symptoms suggestive of hepatic injury develop. | 6 months or after discontinuation of prior therapy) result is available. Treatment with fingolimod should not be initiated when lymphocyte counts are consistently below the normal range.  |                |
| <b>Teriflunomide<sup>III</sup></b> | Obtain transaminase and bilirubin levels within 6 months before initiation of teriflunomide therapy.<br><br>Monitor ALT levels at least monthly for six months after starting teriflunomide.                                | Obtain a complete blood cell count within 6 months before initiating treatment with teriflunomide.<br><br>Further monitoring should be based on signs and symptoms suggestive of infection. | Not applicable |

#### References:

- I. Biogen Canada Inc. TECFIDERA (Dimethyl fumarate delayed-release capsules 120 mg and 240 mg) product monograph [online].  
Available at: <https://www.canada.ca/en/health-canada/services/drugs-health-products/drug-products/drug-product-database.html>.

Accessed August 9, 2019.

- II. Novartis Pharmaceuticals Canada Inc. GILENYA (Fingolimod capsules 0.25mg and 0.5 mg) product monograph [online]. Available at: <https://www.canada.ca/en/health-canada/services/drugs-health-products/drug-products/drug-product-database.html>. Accessed August 9, 2019.
- III. Sanofi Genzyme A Division of Sanofi-Aventis Canada Inc. AUBAGIO (Teriflunomide tablets 14 mg) product monograph [online]. Available at: <https://www.canada.ca/en/health-canada/services/drugs-health-products/drug-products/drug-product-database.html>. Accessed August 9, 2019
